# Supplementary material for: The petroleum geology of the Niger Delta: Present knowledge and future challenges
Source: Royal Society of Chemistry journal article supplement (doi:10.1039/c8nr06567e), 1995-08-01
Supplement: c8nr06567e1.pdf [file c8nr06567e1.pdf]

Supporting Information: ns-laser irradiation of t-GST thin film

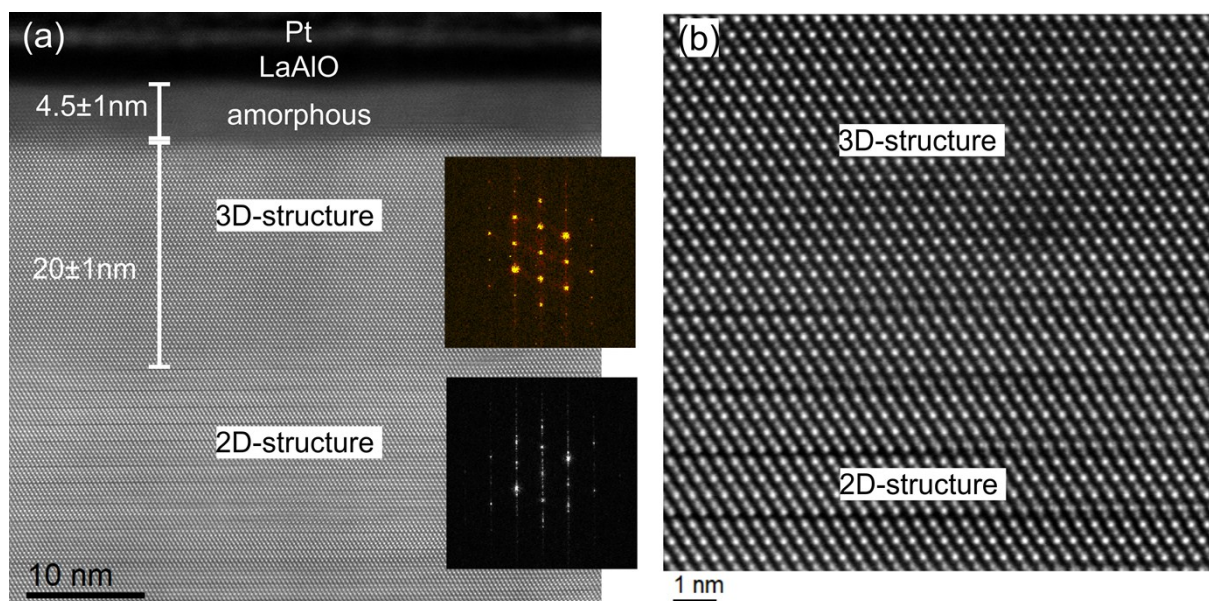

TEM images of an epitaxial t-GST thin film after irradiation with a single ns-laser pulse of a fluence of  $15 \text{ mJ/cm}^2$ .
